# Supplementary material for: Bone Marrow Mesenchymal Stromal Cell-mediated Resistance in Multiple Myeloma Against NK Cells can be Overcome by Introduction of CD38-CAR or TRAIL-variant
Source: PubMed Central journal article supplement — Hemasphere. 2021 Apr 21;5(5):e561. doi: 10.1097/HS9.0000000000000561 (PMC8061681; doi:10.1097/hs9.0000000000000561), 2021-04-21
Supplement: hs9-5-e561-s001.pdf [file hs9-5-e561-s001.pdf]

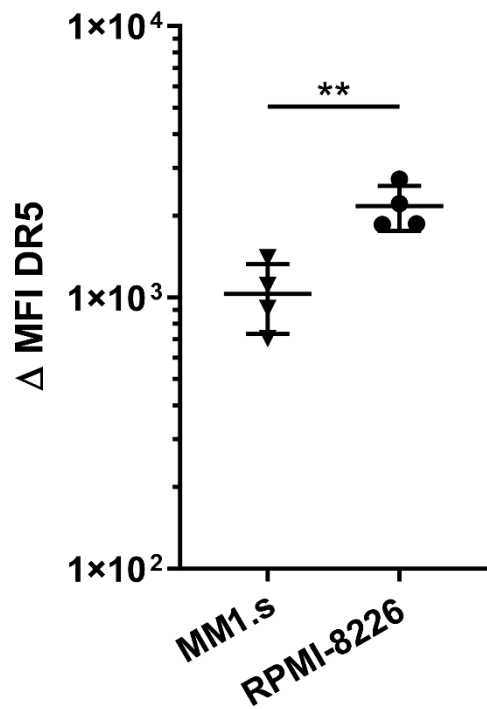

Supplementary figure S2. DR5 expression on MM cell lines. DR5 expression levels on MM cell lines MM1.s and RPMI-8226 were measured by flow cytometry. Median fluorescence intensity (MFI) was corrected for isotype control antibody and illustrated as delta MFI. Error bars represent means with SD of four independent measurements. The statistical difference between the two MM cell lines was calculated using an unpaired *t*-test (\*\* *P* < 0.001).
